# Supplementary material
Source: publisher figshare collection journal article supplement (https://gsajournals.figshare.com/articles/dataset/_/12984149)
Supplement: Supplementary file 1 [file 1]

## **Supplementary Information**

1. Figure S1- Melted dsDNA donors promote homology directed repair
2. Figure S2- High doses of donor DNA reduce the number of Rollers
3. Figure S3- Precise genome editing using Cas12a nuclease and melted dsDNA donors
4. Figure S4- Quickly cooled donors are better repair templates than slowly cooled donors
5. Table S1- List of *C. elegans* strains
6. Table S2- Sequences of crRNAs
7. Table S3- Sequences of Oligos
8. File S1- Detailed editing protocol

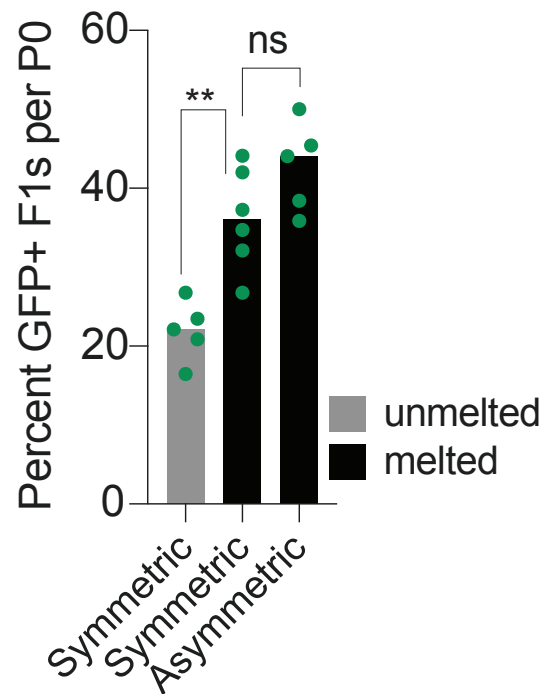

**Figure S1: Melted dsDNA donors promote homology directed repair.** HDR efficiencies at the *glh-1* locus using symmetric (unmelted or melted) and asymmetric donors (n=5 or 6 broods) without *rol-6* injection marker. Each data point (green) represents the percentage of animals expressing GFP among F1s scored per brood. Bars represent median. P-values (\*\*, 0.0087 and ns, 0.1255) were determined by Mann Whitney test (unpaired, non-parametric, two-tailed)

*glh-1*

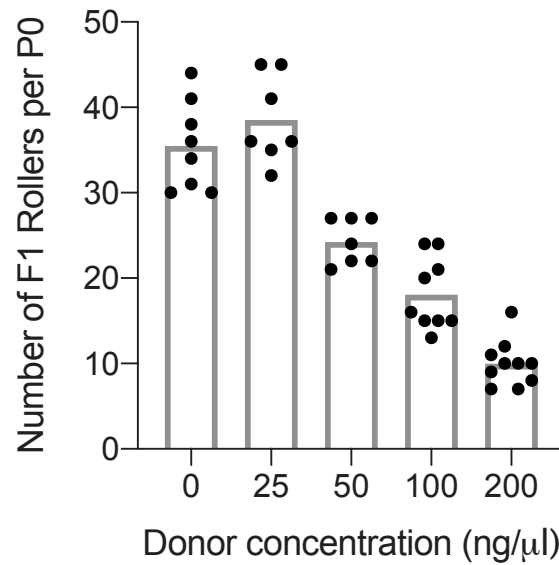

**Figure S2. High doses of donor DNA reduce the number of Rollers.** Injection mixes contain *Prf4::rol-6(su1006)*, Cas9 protein, crRNA targeting *glh-1* locus and *gfp::glh-1* dsDNA donor with ~35bp homology arms at indicated doses. Each dot represents the number of F1 rollers obtained per P0 animal and the bar represents mean; (n=7 to 10 broods per condition). dsDNA donors were not melted.

## Cas12a based genome editing

**A**

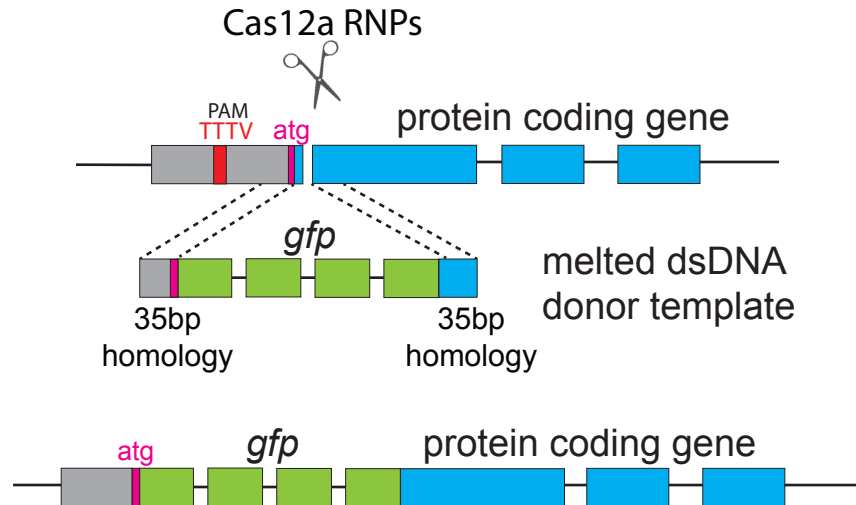

**B**

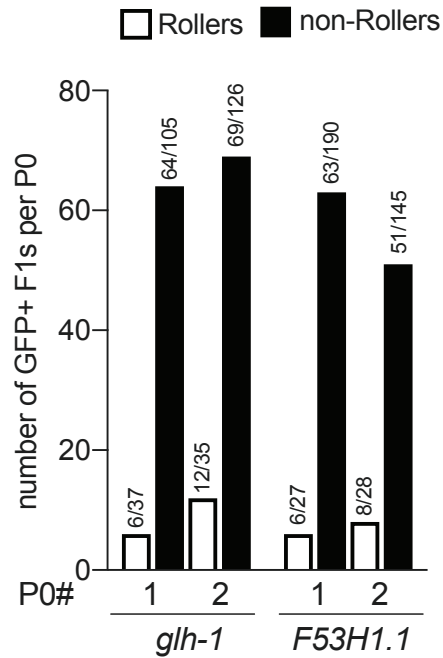

**C**

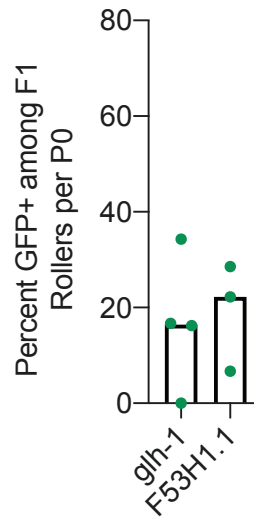

**D**

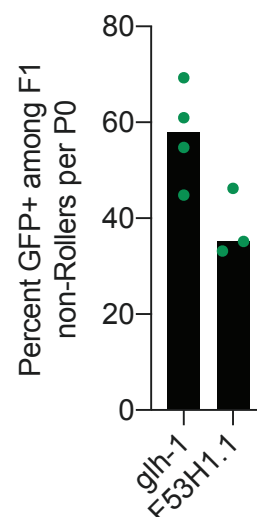

**Figure S3. Precise genome editing using Cas12a nuclease and melted dsDNA donors.** (A) Schematic representation of template dependent editing with Cas12a and melted dsDNA donor to insert *gfp* at the start codon (atg). Protospacer adjacent motif (PAM) for Cas12a system is TTTV, where V is A, C or G. HDR efficiencies at *glh-1* and *F53H1.1* loci are plotted as (B) number of GFP+ F1 animals among two representative broods, (C) percentage of GFP+ animals among F1 Rollers and (D) percentage of GFP+ animals among F1 non-Rollers; n= 3 or 4 broods. Number of GFP+ animals over number of animals scored are shown above the bars. Each data point represents the percentage of animals that are GFP+ among F1s scored in each cohort per brood and bars represent the median.

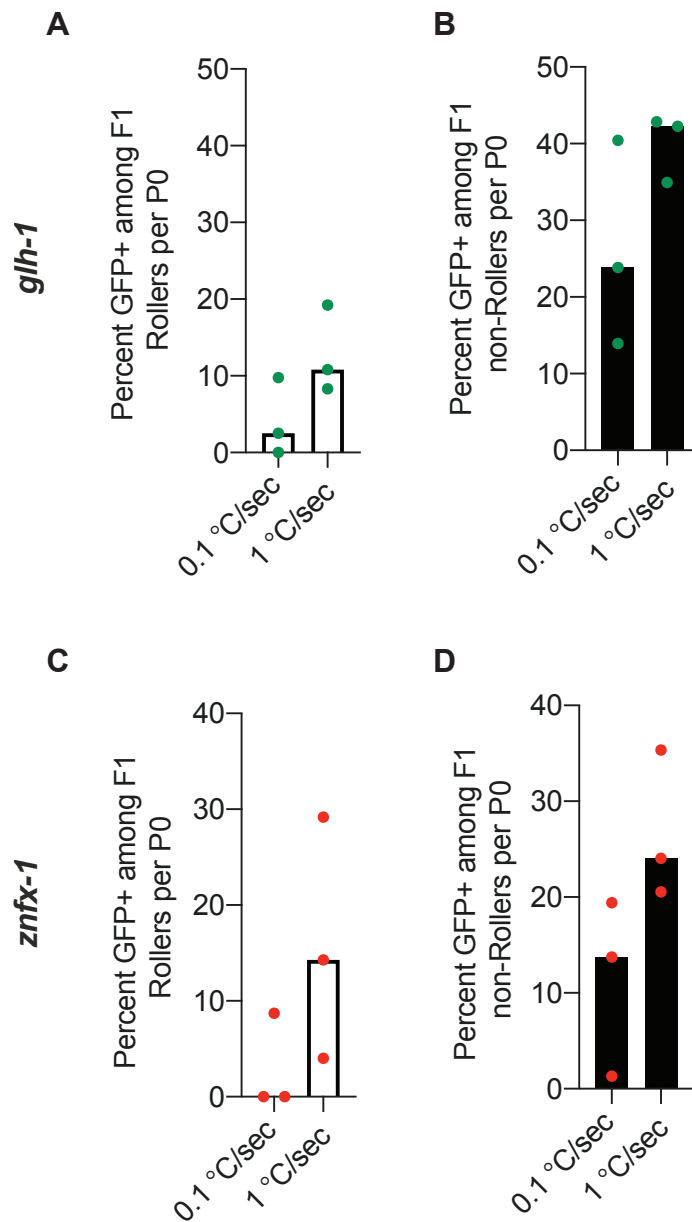

**Figure S4. Quickly cooled donors act as better repair templates than slowly cooled donors.** *gfp* (green dots) insertion efficiencies at *glh-1* loci are plotted for (A) Rollers and (B) non-Rollers using slow (0.1 °C/sec) and quick (1 °C/sec) cooled donors as percentage. (C and D) *mCherry* (red dots) insertion efficiencies at *znfx-1* locus. Each data point represents an F1 brood and bars represent median. Thermal cycler program for slow cooling: 95 °C - 2:00 min; 85 °C - 1:00 min; 75 °C - 1:00 min, 65 °C - 1:00 min, 55 °C - 1:00 min, 45 °C - 1:00 min, 35 °C - 1:00 min, 25 °C - 1:00 min, 4°C- hold. Ramp down rate: 0.1 °C/sec. P-value = 0.2 for panels A, B, C and 0.1 for panel D (Mann-witney test, two-tailed). See **File S1** for quick cooling conditions.

**Supplemental Table S1: List of *C. elegans* strains**

| Genotype                                          | Strain Name |
|---------------------------------------------------|-------------|
| F53H1.1(ne4815[gfp::F53H1.1]) IV                  | WM703       |
| glh-1(ne4816[gfp::glh-1]) I                       | WM704       |
| csr-1(ne4483[flagx3::linker::tev] IV              | WM705       |
| znfx-1(ne4817[mcherry::znfx-1]) II                | WM706       |
| hrde-1(ne4818[gfp::hrde-1]) III                   | WM707       |
| csr-1(ne4819[flagx3::linker::gfp::tev::csr-1]) IV | WM708       |

**Supplemental Table S2: Sequences of crRNAs**

| ID#    | Target locus               | Sequence (5'→3')       | Notes                                 |
|--------|----------------------------|------------------------|---------------------------------------|
| CMG-18 | <i>hrde-1</i>              | CATAATTTTGTCTGAGCAAGT  | To insert N-terminal tag              |
| CMG-25 | <i>csr-1</i>               | AAGATGTTTCAGGGCAAGTCT  | To insert N-terminal tag              |
| CMG-33 | <i>Flagx3::linker::tev</i> | TATAAAGACGATGACGATAA   | To insert gfp at csr-1 locus          |
| CMG-34 | <i>glh-1</i>               | TTTTCTGCGAAAATGTCTGA   | To insert N-terminal tag              |
| CMG-35 | <i>glh-1</i>               | TGCGAAAATGTCTGATGGTTG  | To insert N-terminal tag; (A.s. Cpf1) |
| CMG-77 | <i>F53H1.1</i>             | TTCCAGTTTTCGATGGGTCG   | To insert N-terminal tag              |
| CMG-79 | <i>F53H1.1(A.s. Cpf1)</i>  | CAGTTTTTCGATGGGTCGCGGC | To insert N-terminal tag              |
| CMG-88 | <i>znfx-1</i>              | AGGTTTCTGACCATTGAATA   | To insert N-terminal tag              |

**Supplemental Table S3: Sequences of oligos**

| ID#        | Sequence (5'→3')                                                                                                                                                                                            | Notes                                                             |
|------------|-------------------------------------------------------------------------------------------------------------------------------------------------------------------------------------------------------------|-------------------------------------------------------------------|
| cmo-KG475F | ATTTTCTGGAAAAATCTTAA                                                                                                                                                                                        | <i>gfp::glh-1</i> donor                                           |
| cmo-KG476R | TTAGCAGCACTTTCGCTATC                                                                                                                                                                                        |                                                                   |
| cmo-KG830F | /SP9/TCGTTTCATCGTTTCTTATTTCAGTCAAACATGTCCGGAGGGAGTGGA                                                                                                                                                       | <i>gfp::hrde-1</i> donor                                          |
| cmo-KG831R | /SP9/GTTGGAAGACGAACCTCCCATAAATTTTGTCTGAGCAAGTCTGCAGAACCTCCGCCACC                                                                                                                                            |                                                                   |
| cmo-KG832F | /SP9/ATCCAAAAATCCCCAATTTTTTCCAGTTTTCGATGTCCGGAGGGAGTGGA                                                                                                                                                     | <i>gfp::F53H1.1</i> donor                                         |
| cmo-KG833R | /SP9/ACGCTTTCGTTTGTGCTCTTTGTGCTCGCCGCGACCAGAACCTCCGCCACC                                                                                                                                                    |                                                                   |
| cmo-T1193F | CTTGTTTCAGACCAATTCGCCAACCGTATTCAATGGTCTCAAAGGGTGAAGAAGA                                                                                                                                                     | <i>mCherry::znfx-1</i> donor                                      |
| cmo-T1194R | GGCGGCGGGAGCCCTGGGGGGGCGAGGTTTCTGACCTTATACAATTCATCCATGC                                                                                                                                                     |                                                                   |
| cmo17648   | AATCTCAATCAGGACGGTAAAG                                                                                                                                                                                      | <i>hrde-1</i> indel detection                                     |
| cmo17649   | GAACCTCTAGGCATAATGTGTA                                                                                                                                                                                      |                                                                   |
| cmo-JG55F  | ACATAAAACGATAAATCGGC                                                                                                                                                                                        | <i>F53H1.1</i> indel detection                                    |
| cmo-JG56R  | TTCCGTGACTCTTCCATTTT                                                                                                                                                                                        |                                                                   |
| cmo-KG825R | CGCCGTTTACTCTCTTT                                                                                                                                                                                           |                                                                   |
| cmo17659   | CGATTGGAAGTAGAGGTTCT                                                                                                                                                                                        | <i>gfp::csr-1</i> donor                                           |
| cmo17660   | ATCATGATATTGACTATAAA                                                                                                                                                                                        |                                                                   |
| cmd-25     | gaactatactttttcaggacttaactctgacatgGATTACAAAGACCATGATGGTGACTATAAGGATCATGATA<br>TTGACTATAAAGACGATGACGATAAGGGTGGCGGAGAGAACCTCTACTTCCAATCGaaCca<br>AaaAcaGaaCccTagGctAgcActAaacatcttcgggcttgagctctctgagcgaacgat | ssODN donor to knock-in flagx3::linker::tev at <i>csr-1</i> locus |
